# Supplementary material
Source: PubMed Central journal article supplement (PMC3756809)

A ECM parameter regime (same as in Fig. 3A)

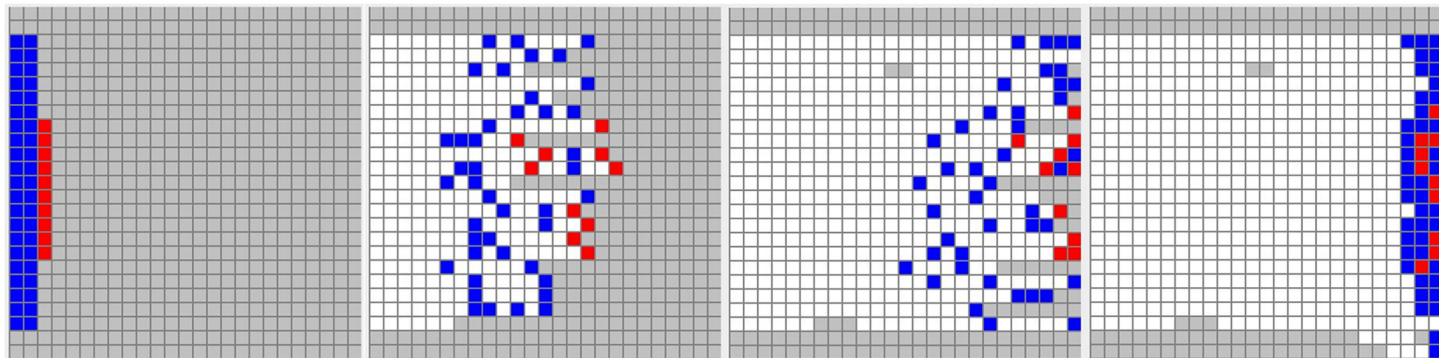

$t=0$

$t=20$

$t=40$

$t=80$

B Contact-ECM parameter regime (same as in Fig. 3D)

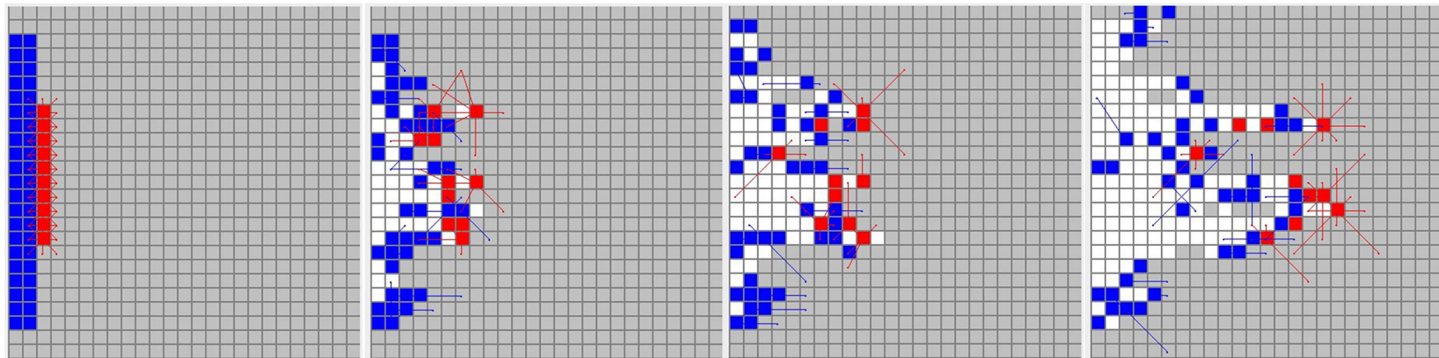

Supplement: NIHMS503993-supplement-PB448694suppdata_pdf.pdf [file NIHMS503993-supplement-PB448694suppdata_pdf.pdf]
